# Supplementary material
Source: HighWire-hosted journal article supplement (https://erj.ersjournals.com/content/51/1/1701107)
Supplement: inline-supplementary-material-1 [file inline-supplementary-material-1.pdf]

**Table S1: Change in dyspnea sensation and functional parameters at the end of the 6MWT after intervention (MDP and Borg scales), in the subgroups of patients with P<sub>lmax</sub> > or ≤60 cm H<sub>2</sub>O**

|                                               |                                                   | IMT group<br>(n = 74) | Control Group<br>(n = 75) | P-Value |
|-----------------------------------------------|---------------------------------------------------|-----------------------|---------------------------|---------|
| <b>Dyspnea Scales</b>                         |                                                   |                       |                           |         |
| Δ Borg Scale                                  | P <sub>lmax</sub> >60cmH <sub>2</sub> O<br>(n=82) | -1.9 ± 2.1            | -0.7 ± 1.1                | 0.004   |
|                                               | P <sub>lmax</sub> ≤60cmH <sub>2</sub> O<br>(n=67) | -0.91 ± 1.8           | -1.3 ± 2.5                | 0.500   |
| Δ MMRC                                        | P <sub>lmax</sub> >60cmH <sub>2</sub> O<br>(n=82) | -1.0 ± 1.0            | -0.8 ± 1.2                | 0.277   |
|                                               | P <sub>lmax</sub> ≤60cmH <sub>2</sub> O<br>(n=67) | -0.7 ± 1.3            | -0.8 ± 1.4                | 0.906   |
| <b>MDP questionnaire</b>                      |                                                   |                       |                           |         |
| Δ <i>Sensory Intensity</i>                    | P <sub>lmax</sub> >60cmH <sub>2</sub> O<br>(n=82) | -4.85 ± 10.5          | -1.8 ± 9.5                | 0.178   |
|                                               | P <sub>lmax</sub> ≤60cmH <sub>2</sub> O<br>(n=67) | -4.39 ± 10.6          | -5.76 ± 12.4              | 0.632   |
| Δ <i>Muscle work / Effort</i>                 | P <sub>lmax</sub> >60cmH <sub>2</sub> O<br>(n=82) | -0.9 ± 3.1            | -0.5 ± 2.3                | 0.605   |
|                                               | P <sub>lmax</sub> ≤60cmH <sub>2</sub> O<br>(n=67) | -0.6 ± 2.7            | -1.4 ± 3.5                | 0.278   |
| Δ <i>Not enough air/smother/air hunger</i>    | P <sub>lmax</sub> >60cmH <sub>2</sub> O<br>(n=82) | -1.3 ± 3.2            | -1.4 ± 2.9                | 0.521   |
|                                               | P <sub>lmax</sub> ≤60cmH <sub>2</sub> O<br>(n=67) | -1.2 ± 3.4            | -0.6 ± 2.4                | 0.434   |
| Δ <i>Tight/constricted</i>                    | P <sub>lmax</sub> >60cmH <sub>2</sub> O<br>(n=82) | -0.7 ± 2.5            | -0.2 ± 2.1                | 0.330   |
|                                               | P <sub>lmax</sub> ≤60cmH <sub>2</sub> O<br>(n=67) | -0.6 ± 3.0            | -0.7 ± 2.7                | 0.865   |
| Δ <i>Mental effort/concentrate</i>            | P <sub>lmax</sub> >60cmH <sub>2</sub> O<br>(n=82) | -0.8 ± 2.8            | -0.4 ± 2.5                | 0.514   |
|                                               | P <sub>lmax</sub> ≤60cmH <sub>2</sub> O<br>(n=67) | -1.3 ± 2.9            | -0.9 ± 3.4                | 0.530   |
| Δ <i>Breathing a lot (rapid. deep. heavy)</i> | P <sub>lmax</sub> >60cmH <sub>2</sub> O<br>(n=82) | -1.33 ± 2.6           | -0.1 ± 3.3                | 0.054   |
|                                               | P <sub>lmax</sub> ≤60cmH <sub>2</sub> O<br>(n=67) | -0.6 ± 3.0            | -1.4 ± 3.4                | 0.338   |
| <b>SGRQ</b>                                   |                                                   |                       |                           |         |
| Δ Total                                       | P <sub>lmax</sub> >60cmH <sub>2</sub> O<br>(n=82) | -11.1 ± 10.6          | -7.4 ± 14.0               | 0.198   |
|                                               | P <sub>lmax</sub> ≤60cmH <sub>2</sub> O<br>(n=67) | -8.9 ± 11.3           | -11.0 ± 10.0              | 0.437   |
| Δ Symptoms                                    | P <sub>lmax</sub> >60cmH <sub>2</sub> O<br>(n=82) | -6.1 ± 14.3           | -4.1 ± 13.6               | 0.528   |
|                                               | P <sub>lmax</sub> ≤60cmH <sub>2</sub> O<br>(n=67) | -3.3 ± 16.2           | -2.6 ± 16.3               | 0.866   |
| Δ Activity                                    | P <sub>lmax</sub> >60cmH <sub>2</sub> O<br>(n=82) | -11.1 ± 10.8          | -9.0 ± 18.5               | 0.061   |
|                                               | P <sub>lmax</sub> ≤60cmH <sub>2</sub> O<br>(n=67) | -6.63 ± 18.2          | -11.9 ± 16.5              | 0.226   |
| Δ Impact                                      | P <sub>lmax</sub> >60cmH <sub>2</sub> O<br>(n=82) | -12.4 ± 14.7          | -7.9 ± 16.3               | 0.190   |
|                                               | P <sub>lmax</sub> ≤60cmH <sub>2</sub> O<br>(n=67) | -11.6 ± 12.7          | -13.0 ± 11.9              | 0.665   |
| <b>Functional parameters</b>                  |                                                   |                       |                           |         |
| Δ P <sub>lmax</sub> (cm H <sub>2</sub> O)     | P <sub>lmax</sub> >60cmH <sub>2</sub> O<br>(n=82) | 14.5 ± 15.1           | 8.3 ± 13.2                | 0.054   |
|                                               | P <sub>lmax</sub> ≤60cmH <sub>2</sub> O<br>(n=67) | 15.2 ± 14.8           | 12.0 ± 14.3               | 0.374   |

Δ: difference (after minus before intervention); cm: centimeters; IMT: Inspiratory muscle training; l: liters; m: meters; MDP: multidimensional dyspnea profile; MMRC: Modified Medical Research Council; P<sub>lmax</sub>: maximal inspiratory pressure; SGRQ: Saint George's Respiratory Questionnaire

Values are expressed as mean ± SD
