# Supplementary material
Source: HighWire-hosted journal article supplement (https://erj.ersjournals.com/content/51/1/1701107)
Supplement: inline-supplementary-material-2 [file inline-supplementary-material-2.pdf]

**Table S2: Change in dyspnea sensation, quality of life, PImax and 6MWD in the subgroups of patients with IC < or ≥ 80% pred.**

|                                               |                          |  | Control group<br>(n = 75) | IMT Group<br>(n = 74) | P-Value |
|-----------------------------------------------|--------------------------|--|---------------------------|-----------------------|---------|
| <b>Dyspnea Scales</b>                         |                          |  |                           |                       |         |
| Δ Borg Scale                                  | IC ≥ 80 %pred<br>(n=42)  |  | -1.29 ± 1.8               | -1.43 ± 1.8           | 0.813   |
|                                               | IC < 80 %pred<br>(n=107) |  | -0.9 ± 1.9                | -1.42 ± 2.2           | 0.188   |
| Δ MMRC                                        | IC ≥ 80 %pred<br>(n=42)  |  | -0.79 ± 1.3               | -0.93 ± 1.1           | 0.720   |
|                                               | IC < 80 %pred<br>(n=107) |  | -0.75 ± 1.2               | -0.87 ± 1.2           | 0.630   |
| <b>MDP questionnaire</b>                      |                          |  |                           |                       |         |
| Δ <i>Sensory Intensity</i>                    | IC ≥ 80 %pred<br>(n=42)  |  | -3.14 ± 9.8               | -4.11 ± 9.6           | 0.762   |
|                                               | IC < 80 %pred<br>(n=107) |  | -3.68 ± 11.3              | -4.98 ± 11.1          | 0.559   |
| Δ <i>Muscle work / Effort</i>                 | IC ≥ 80 %pred<br>(n=42)  |  | -1.5 ± 2.6                | -0.86 ± 2.6           | 0.715   |
|                                               | IC < 80 %pred<br>(n=107) |  | -0.78 ± 3.3               | -0.64 ± 3.1           | 0.826   |
| Δ <i>Not enough air/smother/air hunger</i>    | IC ≥ 80 %pred<br>(n=42)  |  | -0.86 ± 2.3               | -0.89 ± 3.1           | 0.970   |
|                                               | IC < 80 %pred<br>(n=107) |  | -1.02 ± 2.7               | -1.42 ± 3.4           | 0.500   |
| Δ <i>Tight/constricted</i>                    | IC ≥ 80 %pred<br>(n=42)  |  | -0.57 ± 2.4               | -0.36 ± 2.2           | 0.944   |
|                                               | IC < 80 %pred<br>(n=107) |  | -0.38 ± 2.4               | -0.82 ± 3.1           | 0.398   |
| Δ <i>Mental effort/concentrate</i>            | IC ≥ 80 %pred<br>(n=42)  |  | -0.64 ± 1.7               | -1.36 ± 2.7           | 0.353   |
|                                               | IC < 80 %pred<br>(n=107) |  | -0.6 ± 3.1                | -0.84 ± 2.9           | 0.683   |
| Δ <i>Breathing a lot (rapid. deep. heavy)</i> | IC ≥ 80 %pred<br>(n=42)  |  | 0.43 ± 3.6                | -0.64 ± 1.9           | 0.316   |
|                                               | IC < 80 %pred<br>(n=107) |  | -0.9 ± 3.3                | -1.24 ± 3.2           | 0.590   |
| <b>SGRQ</b>                                   |                          |  |                           |                       |         |
| Δ Total                                       | IC ≥ 80 %pred<br>(n=42)  |  | -10.14 ± 11.8             | -12.18 ± 11.1         | 0.586   |
|                                               | IC < 80 %pred<br>(n=107) |  | -8.71 ± 12.7              | -8.7 ± 10.7           | 0.995   |
| Δ Symptoms                                    | IC ≥ 80 %pred<br>(n=42)  |  | -3.21 ± 13.6              | -6.21 ± 16.3          | 0.558   |
|                                               | IC < 80 %pred<br>(n=107) |  | -3.47 ± 15.2              | -3.88 ± 14.4          | 0.891   |
| Δ Activity                                    | IC ≥ 80 %pred<br>(n=42)  |  | -13.36 ± 17.8             | -13.04 ± 11.6         | 0.944   |
|                                               | IC < 80 %pred<br>(n=107) |  | -9.58 ± 17.6              | -6.51 ± 16.0          | 0.369   |
| Δ Impact                                      | IC ≥ 80 %pred<br>(n=42)  |  | -10.29 ± 13.0             | -13.21 ± 13.5         | 0.507   |
|                                               | IC < 80 %pred<br>(n=107) |  | -10.05 ± 15.1             | -11.33 ± 14.0         | 0.665   |
| <b>Functional parameters</b>                  |                          |  |                           |                       |         |
| Δ PImax (cm H <sub>2</sub> O)                 | IC ≥ 80 %pred<br>(n=42)  |  | 9.5 ± 14.7                | 16 ± 12.6             | 0.147   |
|                                               | IC < 80 %pred<br>(n=107) |  | 10.03 ± 13.7              | 14.11 ± 16.2          | 0.166   |
| Δ 6MWD (m)                                    | IC ≥ 80 %pred<br>(n=42)  |  | 38.64 ± 47                | 31.43 ± 48.5          | 0.649   |
|                                               | IC < 80 %pred<br>(n=107) |  | 35.57 ± 44.8              | 18.4 ± 52.7           | 0.075   |

Δ: difference (after minus before intervention); %pred: percentage of the predictive value; cm: centimeters; IMT: Inspiratory muscle training; l: liters; m: meters; MDP: multidimensional dyspnea profile; MMRC: Modified Medical Research Council; PImax: maximal inspiratory pressure; SGRQ: Saint George's Respiratory Questionnaire  
Values are expressed as mean ± SD
