# Supplementary material
Source: HighWire-hosted journal article supplement (https://erj.ersjournals.com/content/51/1/1701107)
Supplement: inline-supplementary-material-3 [file inline-supplementary-material-3.pdf]

**Table S3: Change in dyspnea sensation, quality of life, PImax and 6MWD in the subgroups of patients with IC/TLC ≤ or > 25 %.**

|                                               |                         |  | Control group<br>(n = 75) | IMT Group<br>(n = 74) | P-Value      |
|-----------------------------------------------|-------------------------|--|---------------------------|-----------------------|--------------|
| <b>Dyspnea Scales</b>                         |                         |  |                           |                       |              |
| Δ Borg Scale                                  | IC/TLC > 25%<br>(n=90)  |  | -0.9 ± 1.7                | -1.25 ± 1.8           | 0.341        |
|                                               | IC/TLC ≤ 25 %<br>(n=52) |  | -0.91 ± 1.91              | -1.41 ± 2.58          | 0.832        |
| Δ MMRC                                        | IC/TLC > 25%<br>(n=90)  |  | -0.69 ± 1.2               | -0.96 ± 1.1           | 0.281        |
|                                               | IC/TLC ≤ 25 %<br>(n=52) |  | -0.85 ± 1.4               | -0.59 ± 1.3           | 0.647        |
| <b>MDP questionnaire</b>                      |                         |  |                           |                       |              |
| Δ <i>Sensory Intensity</i>                    | IC/TLC > 25%<br>(n=90)  |  | -3.33 ± 9.2               | -3.94 ± 9.6           | 0.762        |
|                                               | IC/TLC ≤ 25 %<br>(n=52) |  | -3.64 ± 13.0              | -4.59 ± 11.7          | 0.801        |
| Δ <i>Muscle work / Effort</i>                 | IC/TLC > 25%<br>(n=90)  |  | -0.64 ± 2.8               | -0.76 ± 2.9           | 0.841        |
|                                               | IC/TLC ≤ 25 %<br>(n=52) |  | -1.24 ± 3.4               | -0.18 ± 2.8           | 0.367        |
| Δ <i>Not enough air/smother/air hunger</i>    | IC/TLC > 25%<br>(n=90)  |  | -1.21 ± 2.4               | -0.92 ± 3.3           | 0.650        |
|                                               | IC/TLC ≤ 25 %<br>(n=52) |  | -0.7 ± 2.9                | -1.59 ± 3.5           | 0.219        |
| Δ <i>Tight/constricted</i>                    | IC/TLC > 25%<br>(n=90)  |  | -0.28 ± 2.4               | -0.25 ± 2.7           | 0.979        |
|                                               | IC/TLC ≤ 25 %<br>(n=52) |  | -0.58 ± 2.46              | -1.18 ± 2.7           | 0.446        |
| Δ <i>Mental effort/concentrate</i>            | IC/TLC > 25%<br>(n=90)  |  | -0.49 ± 2.1               | -1.16 ± 2.8           | 0.258        |
|                                               | IC/TLC ≤ 25 %<br>(n=52) |  | -0.73 ± 3.6               | -0.53 ± 2.9           | 0.672        |
| Δ <i>Breathing a lot (rapid. deep. heavy)</i> | IC/TLC > 25%<br>(n=90)  |  | -0.72 ± 3.0               | -0.84 ± 2.5           | 0.831        |
|                                               | IC/TLC ≤ 25 %<br>(n=52) |  | -0.39 ± 3.7               | -1.12 ± 3.3           | 0.503        |
| <b>SGRQ</b>                                   |                         |  |                           |                       |              |
| Δ Total                                       | IC/TLC > 25%<br>(n=90)  |  | -11.24 ± 13.7             | -10.8 ± 10.1          | 0.869        |
|                                               | IC/TLC ≤ 25 %<br>(n=52) |  | -6.3 ± 10.8               | -7.63 ± 11.4          | 0.694        |
| Δ Symptoms                                    | IC/TLC > 25%<br>(n=90)  |  | -5.97 ± 14.8              | -3.7 ± 15.6           | 0.491        |
|                                               | IC/TLC ≤ 25 %<br>(n=52) |  | -0.55 ± 14.7              | -8.5 ± 13.9           | 0.077        |
| Δ Activity                                    | IC/TLC > 25%<br>(n=90)  |  | -14.47 ± 18.9             | -10.84 ± 15.1         | 0.319        |
|                                               | IC/TLC ≤ 25 %<br>(n=52) |  | -5.36 ± 15.1              | -5.13 ± 12.6          | 0.621        |
| Δ Impact                                      | IC/TLC > 25%<br>(n=90)  |  | -11.21 ± 15.5             | -12.7 ± 12.4          | 0.618        |
|                                               | IC/TLC ≤ 25 %<br>(n=52) |  | -8.7 ± 14.2               | -8.75 ± 14.8          | 0.990        |
| <b>Functional parameters</b>                  |                         |  |                           |                       |              |
| Δ PImax (cm H <sub>2</sub> O)                 | IC/TLC > 25%<br>(n=90)  |  | 10.28 ± 13.7              | 17.3 ± 14.5           | <b>0.022</b> |
|                                               | IC/TLC ≤ 25 %<br>(n=52) |  | 9.33 ± 13.6               | 9 ± 15.1              | 0.937        |
| Δ 6MWD (m)                                    | IC/TLC > 25%<br>(n=90)  |  | 44.41 ± 43.9              | 27.47 ± 44.38         | 0.075        |
|                                               | IC/TLC ≤ 25 %<br>(n=52) |  | 26.15 ± 44.7              | 8.53 ± 71.9           | 0.366        |

Δ: difference (after minus before intervention); cm: centimetres; IC : Inspiratory Capacity; IMT: Inspiratory muscle training; l: liters; m: meters; MDP: multidimensional dyspnea profile; MMRC: Modified Medical Research Council; PImax: maximal inspiratory pressure; SGRQ: Saint George's Respiratory Questionnaire; TLC: Total Lung Capacity  
Values are expressed as mean ± SD
